# Supplementary material for: Direct regeneration of fluorine-doped carbon-coated LiFePO4 cathode materials from spent lithium-ion batteries
Source: Royal Society of Chemistry journal article supplement (doi:10.1039/d4gc02370f), 2024-01-01
Supplement: d4gc02370f1.pdf [file d4gc02370f1.pdf]

1  
2  
3  
4  
5  
6  
7  
8  
9  
10  
11  
12  
13  
14  
15  
16  
17  
18

## Supporting Information

### **Direct regeneration of fluorine-doped carbon-coated LiFePO<sub>4</sub> cathode material from spent lithium-ion battery**

*Yurong Han, Yin Zhuang Fang, Menglong Yan, Haoyu Qiu, Yifeng Han, Yi Chen,  
Liangyou Lin, Jingwen Qian, Tao Mei, Xianbao Wang\**

Ministry of Education Key Laboratory for the Green Preparation and Application of  
Functional Materials, Hubei Key Laboratory of Polymer Materials (Hubei University),  
Collaborative Innovation Center for Advanced Organic Chemical Materials Co-  
constructed by the Province and Ministry, School of Materials Science and  
Engineering, Hubei University, Wuhan 430062, P.R. China.

\* Corresponding author. Tel.: +86-2788661729; Fax: +86-2788661729.

E-mail: [wxb@hubu.edu.cn](mailto:wxb@hubu.edu.cn) (X.B. Wang)

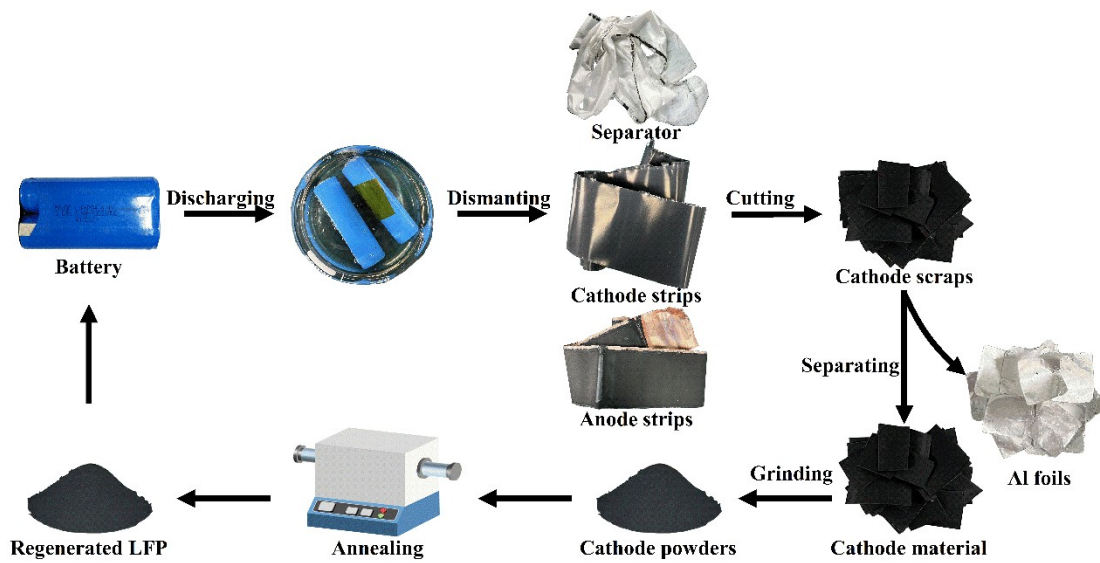

19  
20  
21

Fig. S1 Flowchart for recycling spent LiFePO<sub>4</sub> cathode.

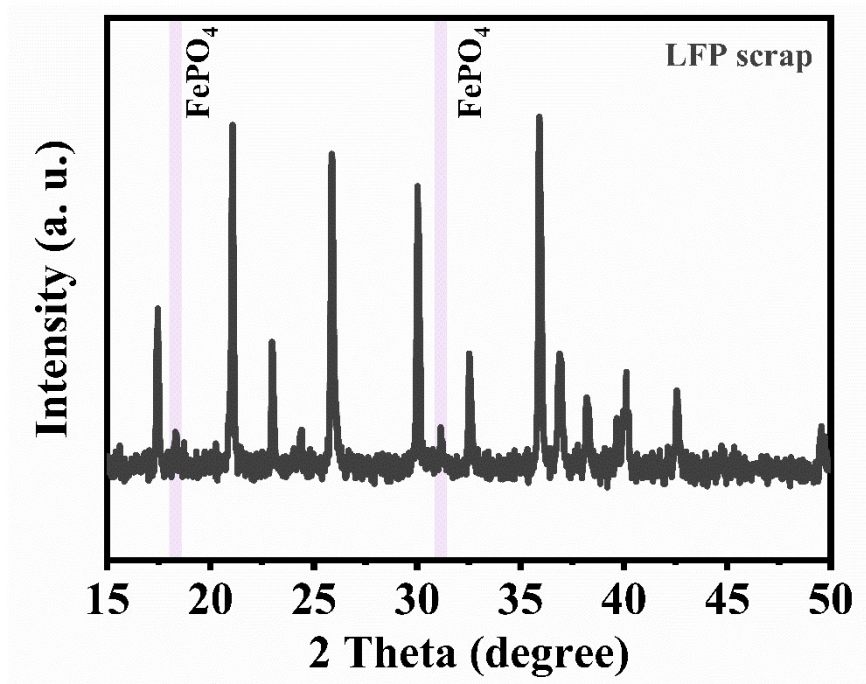

22  
23

Fig. S2 XRD patterns of LFP scrap.

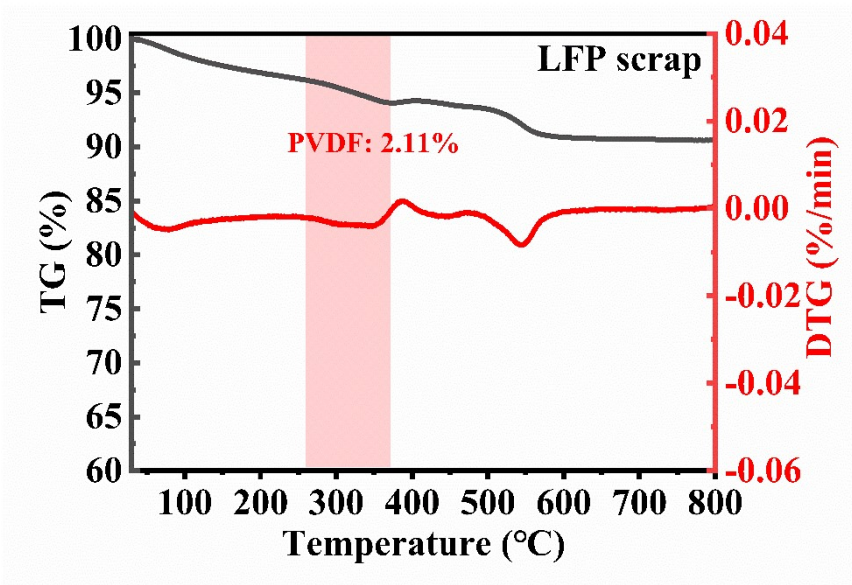

24

25

Fig. S3 Thermogravimetric analysis for LFP scrap.

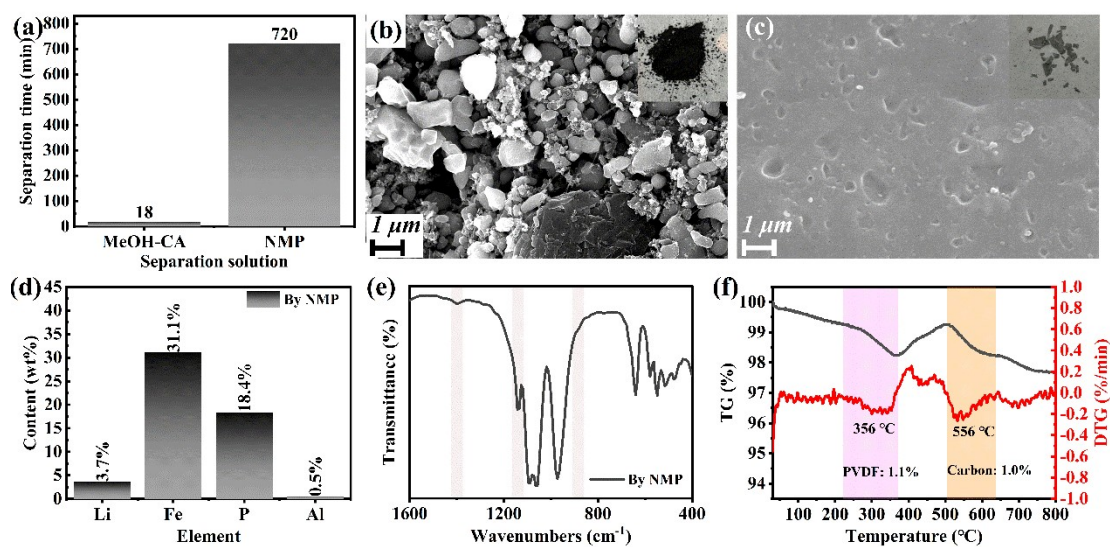

26

27 Fig. S4 (a) Comparison of separation time by MeOH-CA and NMP. SEM and digital images of (b)

28 separated LFP and (c) Al foil by NMP solution. (d) Mass contents of Li, Fe, P and Al elements, (e)

29 FTIR spectra and (f) TG and DTG curves of separated LFP by NMP.

30

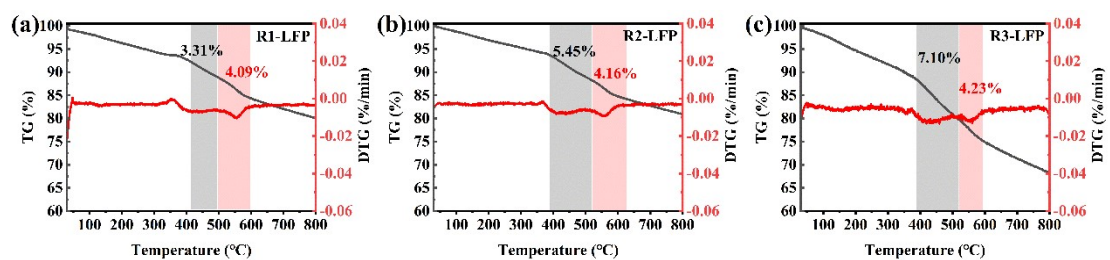

31

32

Fig. S5 Thermogravimetric analysis for R1-LFP, R2-LFP and R3-LFP.

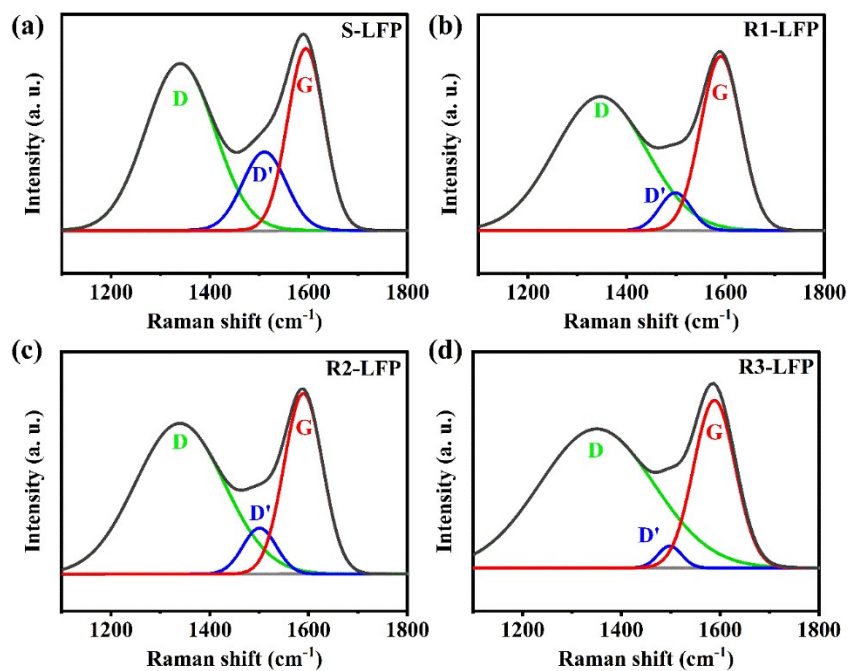

33

34 Fig. S6 Fitted Raman spectra of (a) S-LFP, (b) R1-LFP, (c) R2-LFP and (d) R3-LFP. (Raman results  
35 were fitted according to the literatures<sup>1</sup>.)

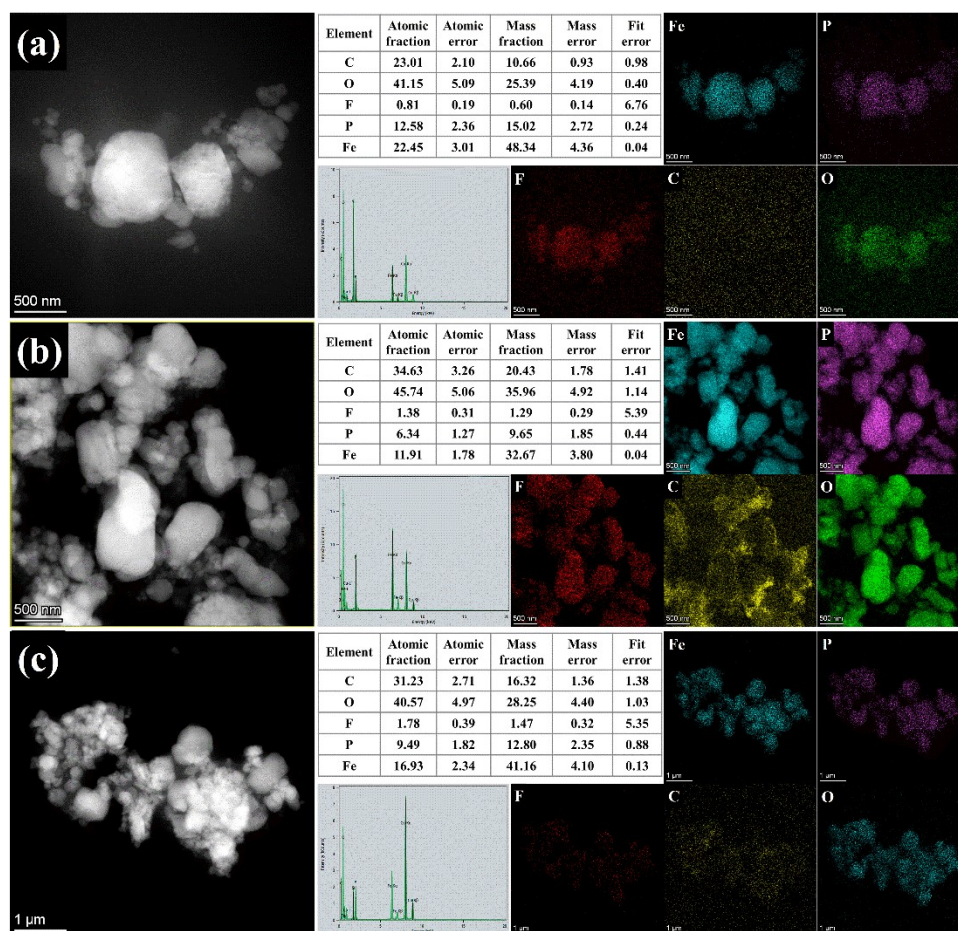

36

37 Fig. S7 HAADF image, element mapping images and EDS image of (a) R1-LFP, (b) R2-LFP and (c)  
38 R3-LFP.

39 Table S1 Element content and molar ratio of LFP scrap, S-LFP, R1-LFP, R2-LFP and  
40 R3-LFP according to ICP-MS results.

|           | Element content (wt%) |       |       |       | Molar ratio |       |
|-----------|-----------------------|-------|-------|-------|-------------|-------|
|           | Li                    | P     | Fe    | Al    | Li/P        | Li/Fe |
| LFP scrap | 3.21                  | 16.33 | 26.68 | 10.61 | 0.88        | 0.97  |
| S-LFP     | 3.59                  | 18.27 | 29.84 | /     | 0.88        | 0.97  |
| R1-LFP    | 4.01                  | 18.21 | 29.72 | /     | 0.99        | 1.08  |
| R2-LFP    | 4.11                  | 18.17 | 29.68 | /     | 1.01        | 1.09  |
| R3-LFP    | 4.20                  | 18.12 | 29.65 | /     | 1.02        | 1.10  |

41

42 Table S2 The results of  $R_{ct}$  fitted by EIS for the samples.

|                | R1-LFP | R2-LFP | R3-LFP | S-LFP |
|----------------|--------|--------|--------|-------|
| $R_{ct}$ (ohm) | 55.19  | 46.09  | 54.96  | 68.08 |

43

44

45 Table S3 The results of  $Li^+$  diffusion fitted by EIS for the samples.

|                            | R1-LFP                    | R2-LFP                    | R3-LFP                    | S-LFP                     |
|----------------------------|---------------------------|---------------------------|---------------------------|---------------------------|
| Equation                   | $y = a + bx$              |                           |                           |                           |
| Intercept (a)              | $70.30661 \pm 0.13570$    | $51.59065 \pm 0.05857$    | $59.72192 \pm 0.01595$    | $60.12832 \pm 0.42547$    |
| Slope (b)                  | $90.03374 \pm 0.99842$    | $46.36614 \pm 0.43093$    | $70.61076 \pm 0.11735$    | $138.55402 \pm 3.13046$   |
| R-square                   | 0.99939                   | 0.99965                   | 0.99999                   | 0.99796                   |
| $D_{Li}$ ( $cm^2 s^{-1}$ ) | $6.58844 \times 10^{-15}$ | $2.48423 \times 10^{-14}$ | $1.07115 \times 10^{-14}$ | $2.78199 \times 10^{-15}$ |

46

47 Table S4 Summarized cost of direct recycling 1 t spent LFP scraps via in this study.

| Material & Process               | Cost (\$) | Notes and References                                                                                                                             |
|----------------------------------|-----------|--------------------------------------------------------------------------------------------------------------------------------------------------|
| Cathode scrap                    | 2224.41   |                                                                                                                                                  |
| Methanol                         | 577.19    |                                                                                                                                                  |
| CA·H <sub>2</sub> O              | 479.81    |                                                                                                                                                  |
| Separating                       | 0.43      | Assumed stirred by a 200 L V-shape barrel industrial mixer for 20 runs (20 * 2000 W * 15 min = 480 kW h) and briefly dried in 60°C oven (~7kWh). |
| Li <sub>2</sub> CO <sub>3</sub>  | 226.16    |                                                                                                                                                  |
| PVDF                             | 1.56      |                                                                                                                                                  |
| Mixing                           | 0.25      | Assumed stirred by a 200 L V-shape barrel industrial mixer for 10 runs (10 * 2000 W*0.5 h = 10 kW h)                                             |
| Annealing                        | 187.80    | Based on the analogical energy cost of LFP synthesis <sup>2</sup> .                                                                              |
| Protective Gas (N <sub>2</sub> ) | 49.46     | 4 h * 3600 * 2 mL s <sup>-1</sup> + 40 L per 500 g                                                                                               |
| Tail gas treatment               | 5.38      | Estimated CO <sub>2</sub> of decomposing all carbonous material.                                                                                 |
| Others                           | 32.26     | Analogical estimation of Ref. <sup>3</sup>                                                                                                       |
| Total (\$)                       | 3784.71   |                                                                                                                                                  |

Note: 1 \$ = 7.2268 ¥ (Update time: 2024/3/28)

48

49

50 Table S5 Summarized cost of direct recycling 1 t spent LFP scraps via traditional  
51 method.

| Material & Process               | Cost (\$) | Notes and References                                                                                                                              |
|----------------------------------|-----------|---------------------------------------------------------------------------------------------------------------------------------------------------|
| Cathode scrap                    | 2224.41   |                                                                                                                                                   |
| NMP                              | 3451.9    |                                                                                                                                                   |
| Separating                       | 12.50     | Assumed stirred by a 200 L V-shape barrel industrial mixer for 20 runs (20 * 2000 W * 12 h = 480 kW h) and briefly dried in 60°C oven (~14 kW h). |
| Li <sub>2</sub> CO <sub>3</sub>  | 226.16    |                                                                                                                                                   |
| Glucose                          | 0.03      |                                                                                                                                                   |
| Mixing                           | 0.25      | Assumed stirred by a 200 LV-shape barrel industrial mixer for 10 runs (10 * 2000 W * 0.5 h = 10 kW h)                                             |
| Annealing                        | 187.80    | Based on the analogical energy cost of LFP synthesis <sup>2</sup> .                                                                               |
| Protective Gas (N <sub>2</sub> ) | 49.46     | 4 h * 3600 * 2 mL s <sup>-1</sup> + 40 L per 500 g                                                                                                |
| Tail gas treatment               | 5.38      | Estimated CO <sub>2</sub> of decomposing all carbonous material.                                                                                  |
| Others                           | 32.26     | Analogical estimation of Ref. <sup>3</sup>                                                                                                        |
| Total (\$)                       | 6190.15   |                                                                                                                                                   |

Note: 1 \$ = 7.2268 ¥ (Update time: 2024/3/28)

52

53 Table S6 The benefits of direct recycling 1 t spent LFP scraps.

|                   | Traditional method |            |              | This study |              |
|-------------------|--------------------|------------|--------------|------------|--------------|
|                   | Price (\$/t)       | Dosage (t) | Benefit (\$) | Dosage (t) | Benefit (\$) |
| R-LFP             | 6005.42            | 0.84       | -1145.60     | 0.84       | 1259.84      |
| Conductive carbon | 1695.13            | /          | /            | 0.02       | 33.91        |
| Total (\$)        |                    |            | -1145.60     |            | 1293.75      |

54

Table S7 The summary of several direct recycling processes for spent LFP cathode material in recent years.

| Reagents                                                                                         | Mixture compositions                                                                                                                                                        | Optimized conditions (T, t)  | Annealing parameters                                              | Regenerated capacity                             |
|--------------------------------------------------------------------------------------------------|-----------------------------------------------------------------------------------------------------------------------------------------------------------------------------|------------------------------|-------------------------------------------------------------------|--------------------------------------------------|
| LiOH and citric acid <sup>4</sup>                                                                | LFP with 80 mL of 0.2 M LiOH and 0.08 M citric acid solutions; excess 4% Li <sub>2</sub> CO <sub>3</sub> .                                                                  | 180 °C, 5 h                  | 600 °C, 2 h<br>in N <sub>2</sub>                                  | 159 mAh g <sup>-1</sup><br>(0.5 C, 2.5-3.8 V)    |
| Li <sub>2</sub> SO <sub>4</sub> and N <sub>2</sub> H <sub>4</sub> ·H <sub>2</sub> O <sup>5</sup> | 5 g of LFP with 30 mL of Li <sub>2</sub> SO <sub>4</sub> solution, and 1.0 mL of N <sub>2</sub> H <sub>4</sub> ·H <sub>2</sub> O                                            | 200 °C, 3 h                  | /                                                                 | 141.9 mAh g <sup>-1</sup><br>(1 C, 2.2-4.2 V)    |
| LiOH and L-ascorbic acid <sup>6</sup>                                                            | Molar ratio of LFP:LiOH:L-ascorbic acid is 1:3:3                                                                                                                            | 160 °C, 6 h                  | /                                                                 | 162.8 mAh g <sup>-1</sup><br>(0.2 C, 2.5-4.2 V)  |
| CH <sub>3</sub> COOLi and L-threonine <sup>7</sup>                                               | 1 g of LFP with 180 g of CH <sub>3</sub> COOLi and 180 g of L-threonine                                                                                                     | 180 °C, 6 h                  | /                                                                 | 147.9 mAh g <sup>-1</sup><br>(1 C, 2.5-4.3 V)    |
| Polycyclic aryl-lithium compound <sup>8</sup>                                                    | 0.5 g of LFP with 5.6 mL 0.2M of polycyclic aryl-lithium compound                                                                                                           | 80 °C, 15 min in Ar glovebox | /                                                                 | 138 mAh g <sup>-1</sup><br>(0.5 C, 2.8-4.2 V)    |
| LiI and ethanol <sup>9</sup>                                                                     | 1 g of LFP with 266.4 mg of LiI and 50 mL of ethanol                                                                                                                        | Ambient, 24 h                | /                                                                 | 166 mAh g <sup>-1</sup><br>(1 C, 2.1-4.2 V)      |
| LiOH and H <sub>2</sub> O <sub>2</sub> <sup>10</sup>                                             | A solid–liquid ratio of 5 g L <sup>-1</sup> of LFP, 3 vol% dosage of H <sub>2</sub> O <sub>2</sub> and 0.05 M of LiOH solution; excess 3% Li <sub>2</sub> CO <sub>3</sub> . | 30 °C, 1 h                   | 700 °C, 2 h<br>in N <sub>2</sub>                                  | 141.4 mAh g <sup>-1</sup><br>(1 C, 2.5-4.3 V)    |
| Li <sub>2</sub> CO <sub>3</sub> <sup>11</sup>                                                    | Excess 3% Li <sub>2</sub> CO <sub>3</sub>                                                                                                                                   | /                            | 650 °C, 1 h<br>in Ar/H <sub>2</sub>                               | 140.4 mAh g <sup>-1</sup><br>(0.5 C, 2.5-4.2 V)  |
| Li <sub>2</sub> CO <sub>3</sub> and glucoses <sup>12</sup>                                       | Excess 3% Li <sub>2</sub> CO <sub>3</sub> , 12 wt % glucose                                                                                                                 | /                            | 550 °C, 2 h<br>in N <sub>2</sub> ; 700 °C, 10 h in N <sub>2</sub> | 122.6 mAh g <sup>-1</sup><br>(0.5 C, 2.5-3.8 V)  |
| Li <sub>2</sub> CO <sub>3</sub> and glucoses <sup>13</sup>                                       | Excess 3% Li <sub>2</sub> CO <sub>3</sub> , 12 wt % glucose                                                                                                                 | /                            | 550 °C, 2 h<br>in air; 700 °C, 10 h in N <sub>2</sub>             | 155.7 mAh g <sup>-1</sup><br>(0.5 C, 2.5-3.8 V)  |
| 3,4-dihydroxybenzoinitrile dilithium <sup>14</sup>                                               | /                                                                                                                                                                           | /                            | 800 °C, 6 h<br>in Ar/H <sub>2</sub>                               | 146 mAh g <sup>-1</sup><br>(1 C, 2.5-4.3 V)      |
| LiNO <sub>3</sub> and anhydrous glucose <sup>2</sup>                                             | 1 g of LFP with 0.8 g of LiNO <sub>3</sub> and 0.02 g of anhydrous glucose                                                                                                  | /                            | 300 °C, 0.5 h in air                                              | 162 mAh g <sup>-1</sup><br>(0.1 C, 2.6-4.2 V)    |
| Li <sub>2</sub> CO <sub>3</sub> , CNTs and glucose <sup>15</sup>                                 | LFP with 5 wt% of CNTs, 15 wt% of glucose and 5 wt% of Li <sub>2</sub> CO <sub>3</sub>                                                                                      | /                            | 350 °C, 2h in Ar; 650 °C, 12h in Ar                               | 155.5 mAh g <sup>-1</sup><br>(0.05 C, 2.0-3.8 V) |
| Li <sub>2</sub> CO <sub>3</sub> and PVDF <sup>This study</sup>                                   | Excess 5 mol% Li <sub>2</sub> CO <sub>3</sub> , 5 wt% of PVDF                                                                                                               | /                            | 650 °C, 2 h<br>in N <sub>2</sub>                                  | 159.2 mAh g <sup>-1</sup><br>(0.1 C, 2.5-4.2 V)  |

## Reference

- 1 S. Qiu, L. Xiao, M. L. Sushko, K. S. Han, Y. Shao, M. Yan, X. Liang, L. Mai, J. Feng, Y. Cao, X. Ai, H. Yang and J. Liu, *Adv. Energy Mater.*, 2017, **7**, 1700403.
- 2 Z. H. Wang, H. Xu, Z. R. Liu, M. Z. Jin, L. H. Deng, S. Li and Y. H. Huang, *J. Mater. Chem. A*, 2023, **11**, 9057-9065.
- 3 K. He, Z. Zhang, L. Alai and F. Zhang, *J. Hazard. Mater.*, 2019, **375**, 43-51.
- 4 P. P. Xu, Q. Dai, H. P. Gao, H. D. Liu, M. H. Zhang, M. Q. Li, Y. Chen, K. An, Y. S. Meng, P. Liu, Y. R. Li, J. S. Spangenberg, L. Gaines, J. Lu and Z. Chen, *Joule*, 2020, **4**, 2609-2626.
- 5 Q. Jing, J. Zhang, Y. Liu, W. Zhang, Y. Chen and C. Wang, *ACS Sustainable Chem. Eng.*, 2020, **8**, 17622-17628.
- 6 W. Song, J. Liu, L. You, S. Wang, Q. Zhou, Y. Gao, R. Yin, W. Xu and Z. Guo, *J. Power Sources*, 2019, **419**, 192-202.
- 7 D. Tang, G. Ji, J. Wang, Z. Liang, W. Chen, H. Ji, J. Ma, S. Liu, Z. Zhuang and G. Zhou, *Adv. Mater.*, 2023, **36**, 2309722.
- 8 C. Wu, J. Hu, L. Ye, Z. Su, X. Fang, X. Zhu, L. Zhuang, X. Ai, H. Yang and J. Qian, *ACS Sustainable Chem. Eng.*, 2021, **9**, 16384-16393.
- 9 T. Ouaneche, M. Courty, L. Stievano, L. Monconduit, C. Guéry, M. T. Sougrati and N. Recham, *J. Power Sources*, 2023, **579**, 233248.
- 10 Y. Xu, B. Zhang, Z. Ge, H. Wang, N. Hong, X. Xiao, B. Song, Y. Zhang, Y. Tian, W. Deng, G. Zou, H. Hou and X. Ji, *Chem. Eng. J.*, 2023, **477**, 147201.



- 11 X. Li, J. Zhang, D. Song, J. Song and L. Zhang, *J. Power Sources*, 2017, **345**, 78-84.
- 12 X. Li, Q. Zhou, X. Zhang, M. Ge, H. Zhang, Y. Yin and S. Yang, *ACS Sustainable Chem. Eng.*, 2023, **11**, 14457-14466.
- 13 X. N. Li, M. Y. Wang, Q. B. Zhou, M. Ge, M. D. Zhang, W. F. Liu, Z. P. Shi, H. Y. Yue, H. S. Zhang, Y. H. Yin and S. T. Yang, *ACS Materials Lett.*, 2024, **6**, 640-647.
- 14 G. Ji, J. Wang, Z. Liang, K. Jia, J. Ma, Z. Zhuang, G. Zhou and H. M. Cheng, *Nat. Commun.*, 2023, **14**, 584.
- 15 L. Song, C. Qi, S. Wang, X. Zhu, T. Zhang, Y. Jin and M. Zhang, *Waste Manage.*, 2023, **157**, 141-148.
